# Supplementary material for: Development and validation of a nomogram for predicting survival of Pulmonary invasive mucinous adenocarcinoma based on Surveillance, Epidemiology, and End Results (SEER) database
Source: Research Square preprint supplement (doi:10.21203/rs.3.rs-27681/v2), 2020-10-29
Supplement: Supplementary file 1 [file 50d02fe7118f4bce63938cd8.docx]

**Supplementary materials**


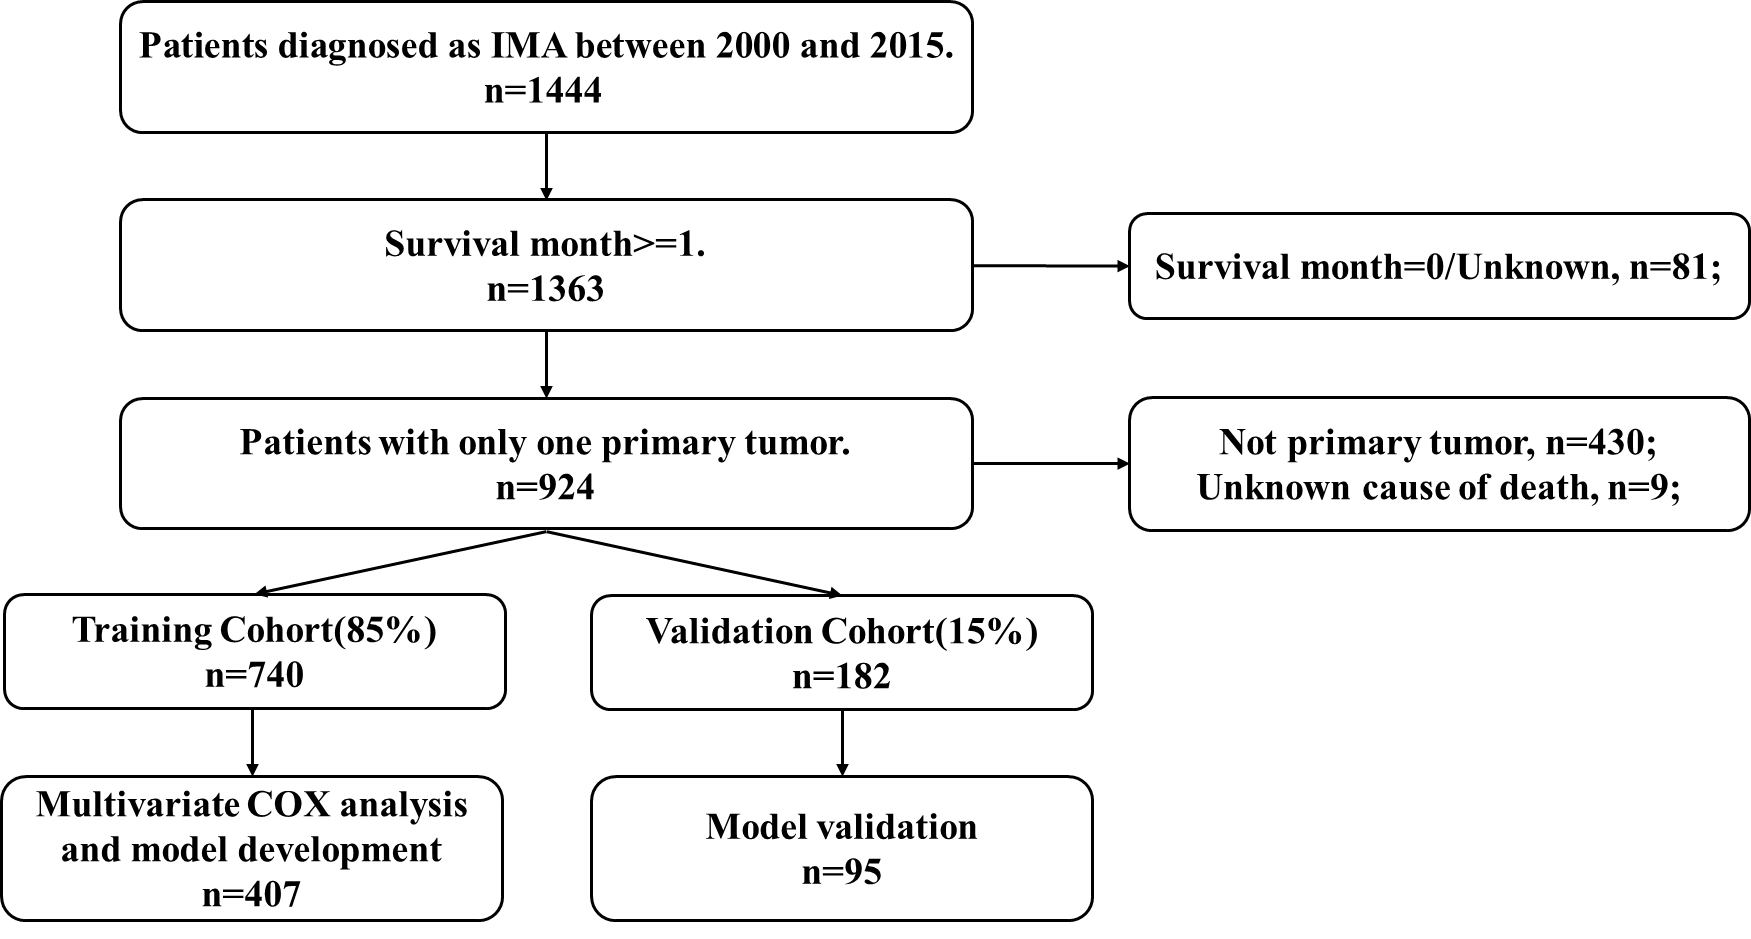


Figure S1. Flow sheet of eligible patients included in the study.


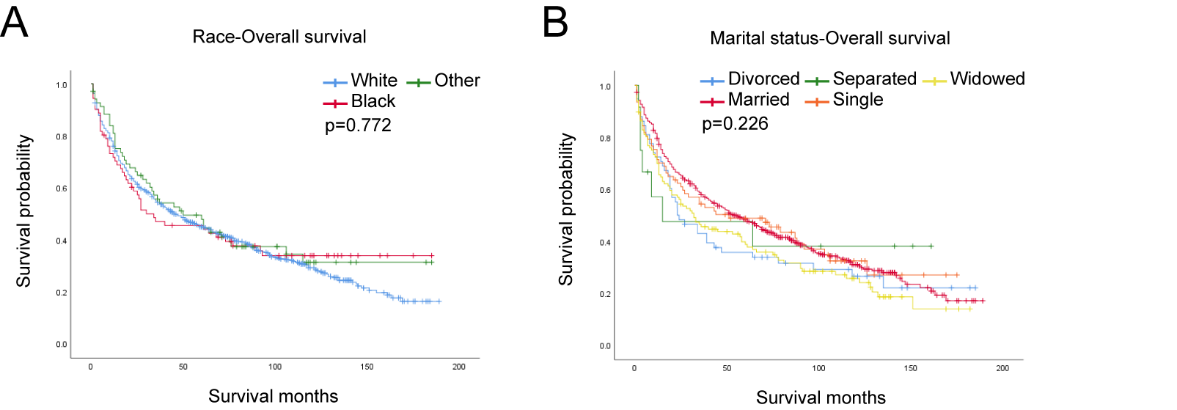


Figure S2. OS for IMA patients stratified by (A) Race, p=0.772; (B) Marital status, p=0.226.


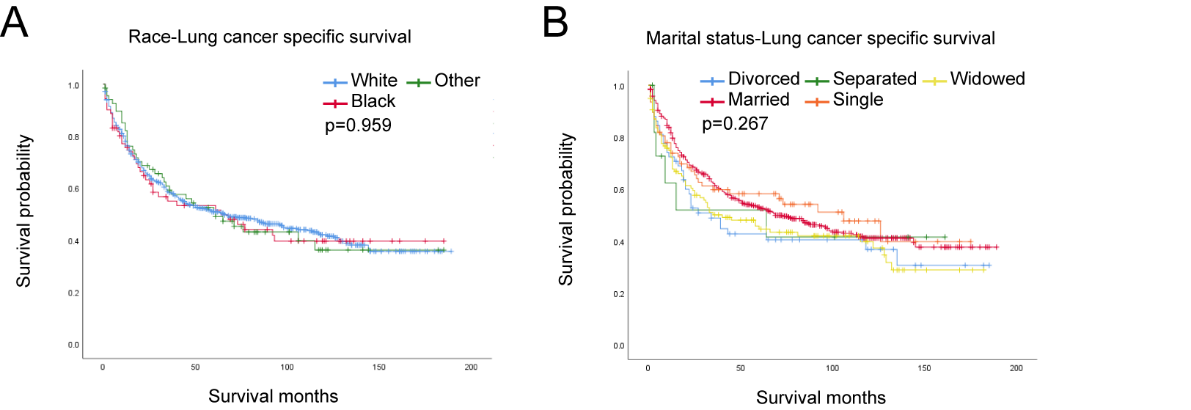


Figure S3. LCSS for IMA patients stratified by (A) Race, p=0.959; (B) Marital status, p=0.267.


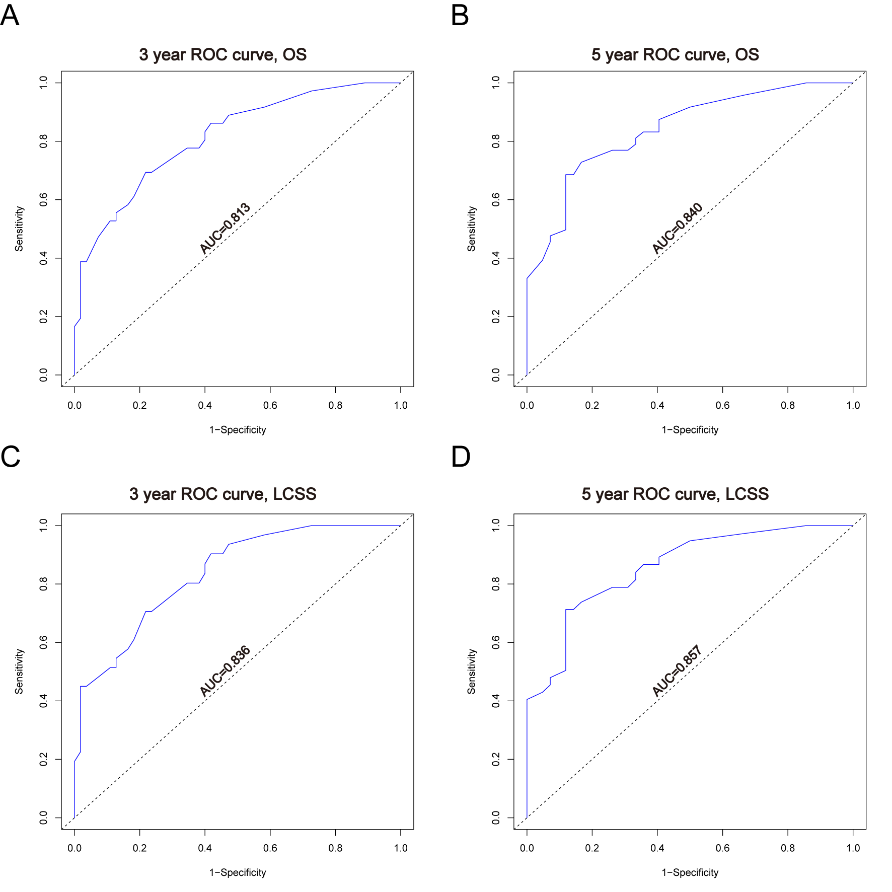


Figure S4. (A. B) ROC curves for 3- and 5-year OS based on the validation cohort data. The AUC was 0.813 and 0.840, respectively; (C. D) ROC curves for 3- and 5-year LCSS. The AUC was 0.836 and 0.857, respectively.


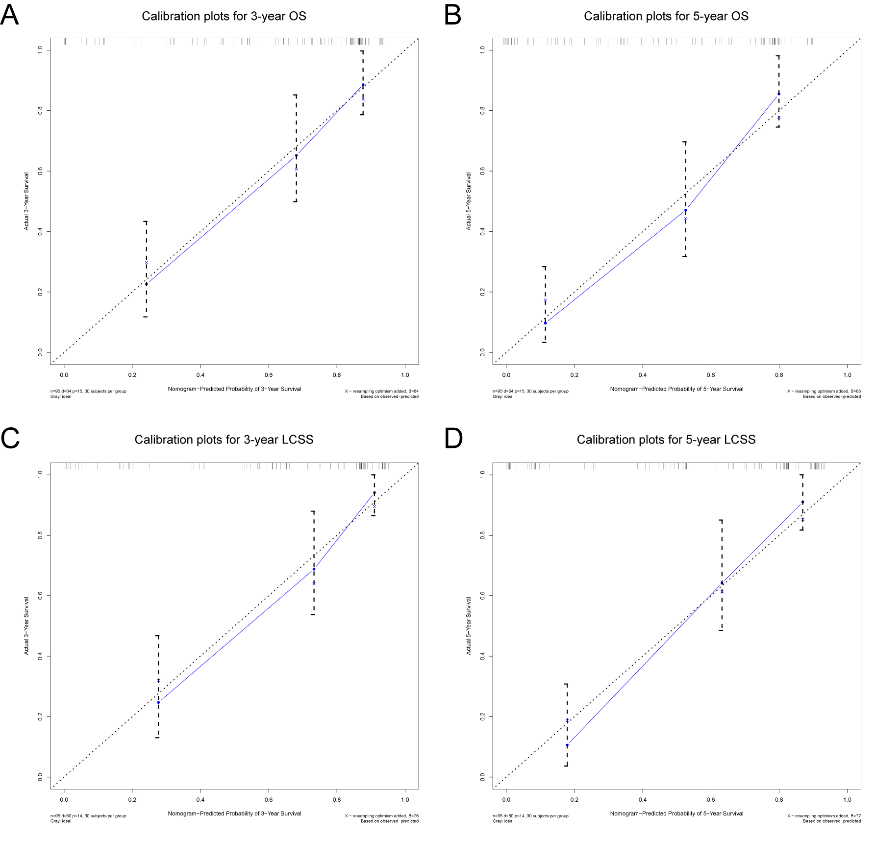


Figure S5. (A. B) Calibration plots for 3- and 5-year OS in the validation cohort; (C. D) Calibration plots for 3- and 5-year LCSS in the validation cohort.
